# Supplementary material for: A genetic map of the chromatin regulators to drug response in cancer cells
Source: PubMed Central journal article supplement (PMC9523919; doi:10.1186/s12967-022-03651-w), 2022-09-30
Supplement: 12967_2022_3651_MOESM1_ESM.pdf [file 12967_2022_3651_MOESM1_ESM.pdf]

## Additional file 1 for

### A Genetic Map of the Chromatin Regulators to Drug Response in Cancer Cells

#### Additional file 1: Supplementary Figures

- Fig. S1. Lung cancer cell lines with *RBI* mutations are resistant to *CDK4/6* inhibitor
- Fig. S2. Sensitive biomarkers interacted with *CHEK1* in large intestine cancer cell lines
- Fig. S3. Resistant biomarkers interacted with *CHEK1* in lung cancer cell lines
- Fig. S4. Functional analysis of the CRs genetic interaction
- Fig. S5. Differential chromatin accessibility for CSL interactions
- Fig. S6. Differential chromatin accessibility for CSV interactions
- Fig. S7. *TUBA1C* subnetwork in drug related CSL network
- Fig. S8. CRs genetic interactions were related to the prognosis of patients
- Fig. S9. *MAP2* CSL module mediate poor prognosis in COAD
- Fig. S10. Vorinostat CSV module induces multiple omics deregulation in COAD
- Fig. S11. *SMARCA4* mutation was sensitive to *FLT1* inhibitor in ovarian cancer cell lines
- Fig. S12. The correlation between protein expression of mutated genes and the target genes dependency in lung cancer cell lines
- Fig. S13. Comparison of the multi-mutation types conferred to CSL in the functional screen datasets
- Fig. S14. Comparison of the multi-mutation types conferred to CSV in the functional screens datasets.

#### Additional file 1: Supplementary Tables

- Table S1. Functional screen datasets
- Table S2. Pharmacogenomics datasets

## Additional file 1: Supplementary Figures

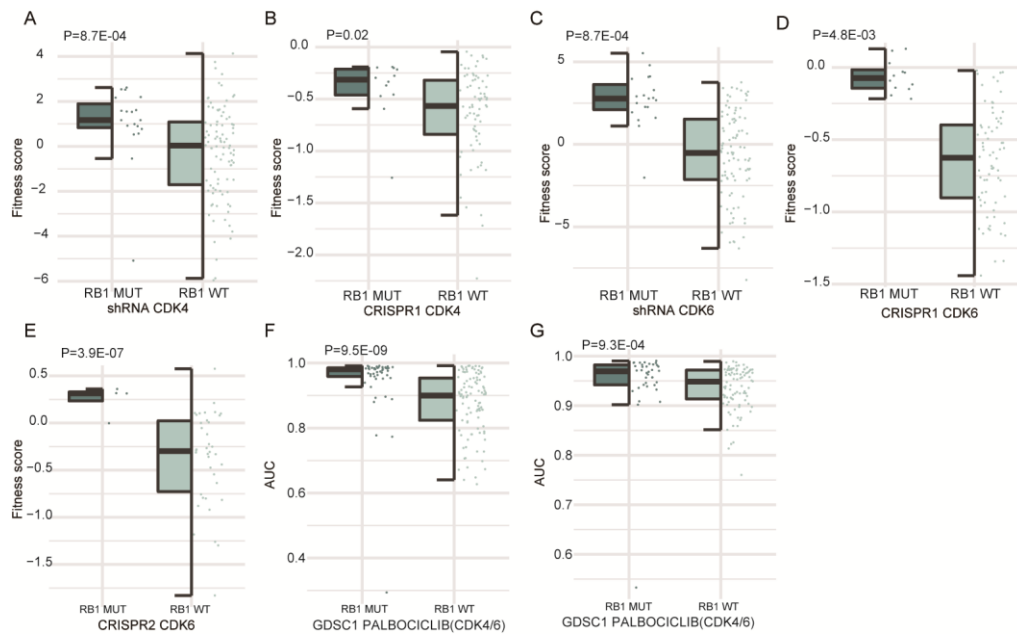

**Fig. S1. Lung cancer cell lines with *RB1* mutations are resistant to *CDK4/6* inhibitor**

Lung cancer cell lines with *RB1* mutations have better viability when *CDK4* were knocked down in shRNA (A) and CRISPR1 (B). Lung cancer cell lines with *RB1* mutations have better viability when *CDK6* were knocked down in shRNA (C), CRISPR1 (D), CRISPR2 (E). Lung cancer cell lines with *RB1* mutations were resistant to inhibitor of *CDK4/6* in GDSC1 (F) and GDSC2 (G).

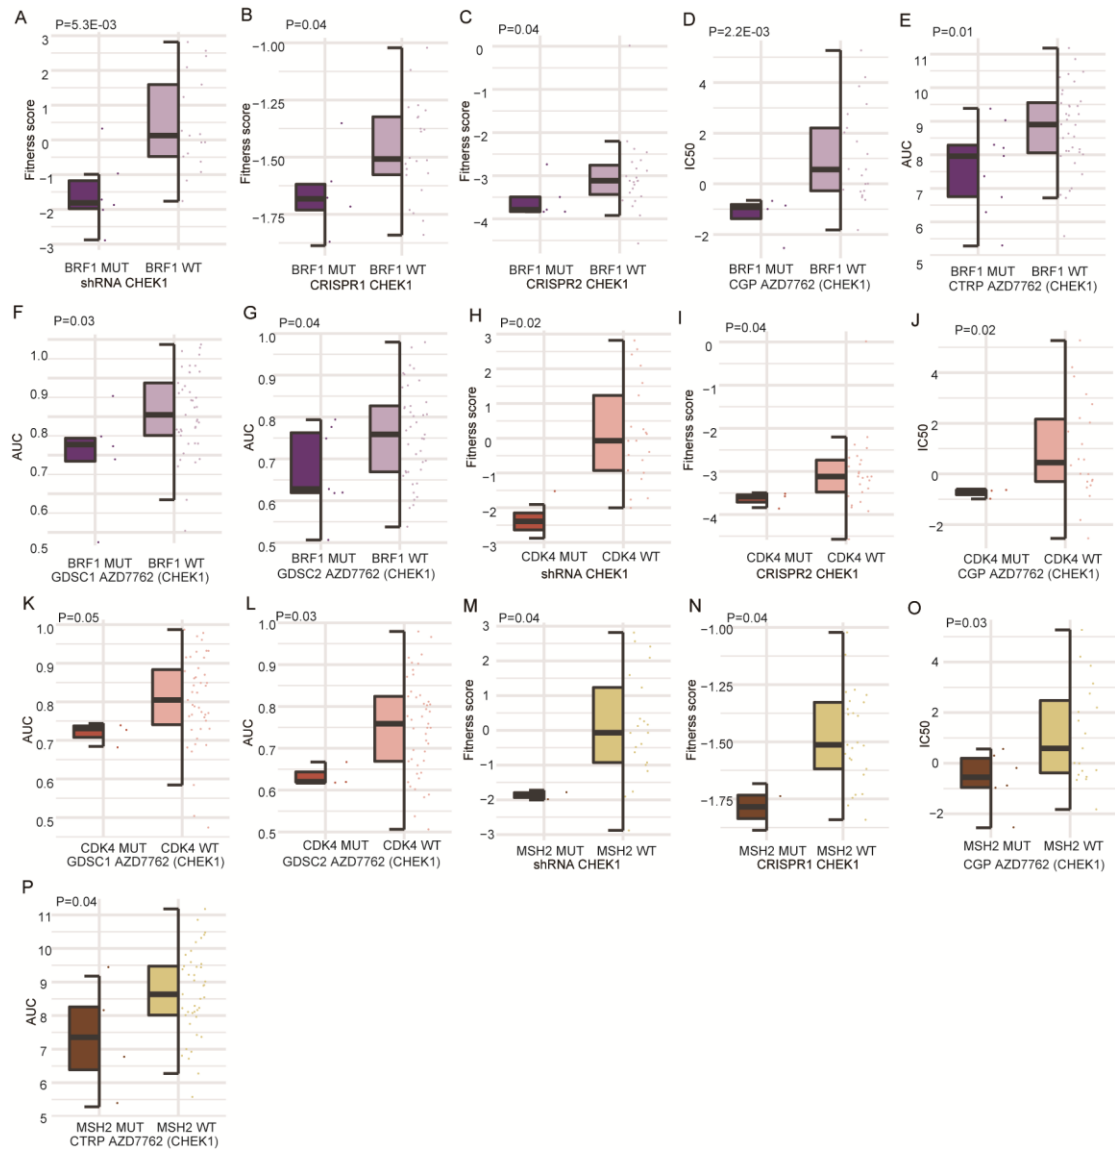

**Fig. S2. Sensitive biomarkers interacted with *CHEK1* in large intestine cancer cell lines**

Large intestine cancer cell lines with *BRF1* mutations had worse viability when *CHEK1* was knocked down in shRNA (A), CRISPR1 (B) and CRISPR2 (C). Large intestine cancer cell lines with *BRF1* mutations were sensitive to AZD7762 in CGP (D), CTRP (E), GDSC1 (F) and GDSC2 (G). Large intestine cancer cell lines with *CDK4* mutations had worse viability when *CHEK1* is knocked down in shRNA (H) and CRISPR2 (I). Large intestine cancer cell lines with *CDK4* mutation were sensitive to AZD7762 in CGP (J), GDSC1 (K) and GDSC2 (L). Large intestine cancer cell lines with *MSH2* mutations had worse viability when *CHEK1* was knocked down in

shRNA (M) and CRISPR1 (N). Large intestine cancer cell lines with *MSH2* mutation were sensitive to AZD7762 in CGP (O) and CTRP (P).

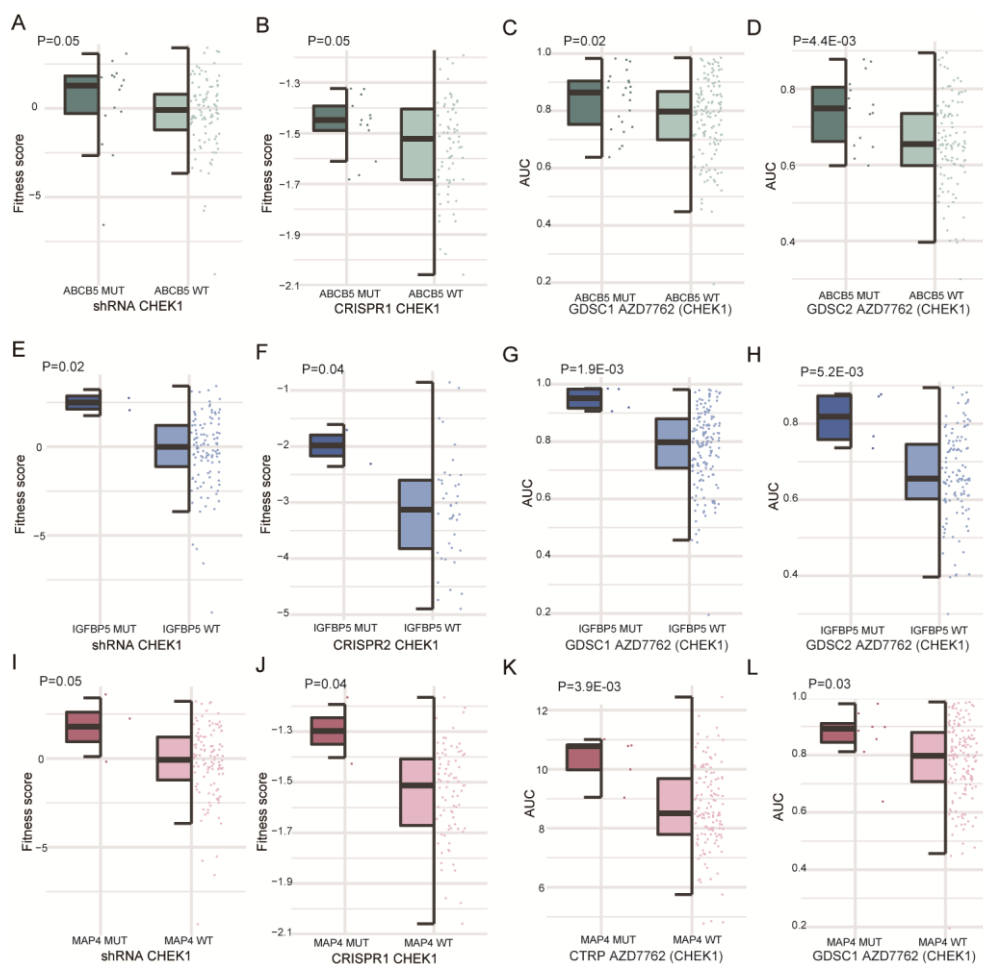

**Fig. S3. Resistant biomarkers interacted with *CHEK1* in lung cancer cell lines**

Lung cancer cell lines with *ABCB5* mutations had better viability when *CHEK1* was knocked down in shRNA (A) and CRISPR1 (B). Lung cell lines with *ABCB5* mutation were resistance to AZD7762 in GDSC1 (C) and GDSC2 (D). Lung cancer cell lines with *IGFBP5* mutation had better viability when *CHEK1* was knocked down in shRNA (E) and CRISPR2 (F). Lung cancer cell lines with *IGFBP5* mutations were resistant to AZD7762 in GDSC1 (G) and GDSC2 (H). Lung cancer cell lines with *MAP4* mutations had better viability when *CHEK1* was knocked down in shRNA (I) and CRISPR1 (J). Lung cancer cell lines with *MAP4* mutations were resistant to

AZD7762 in CTRP (K) GDSC1 (L).

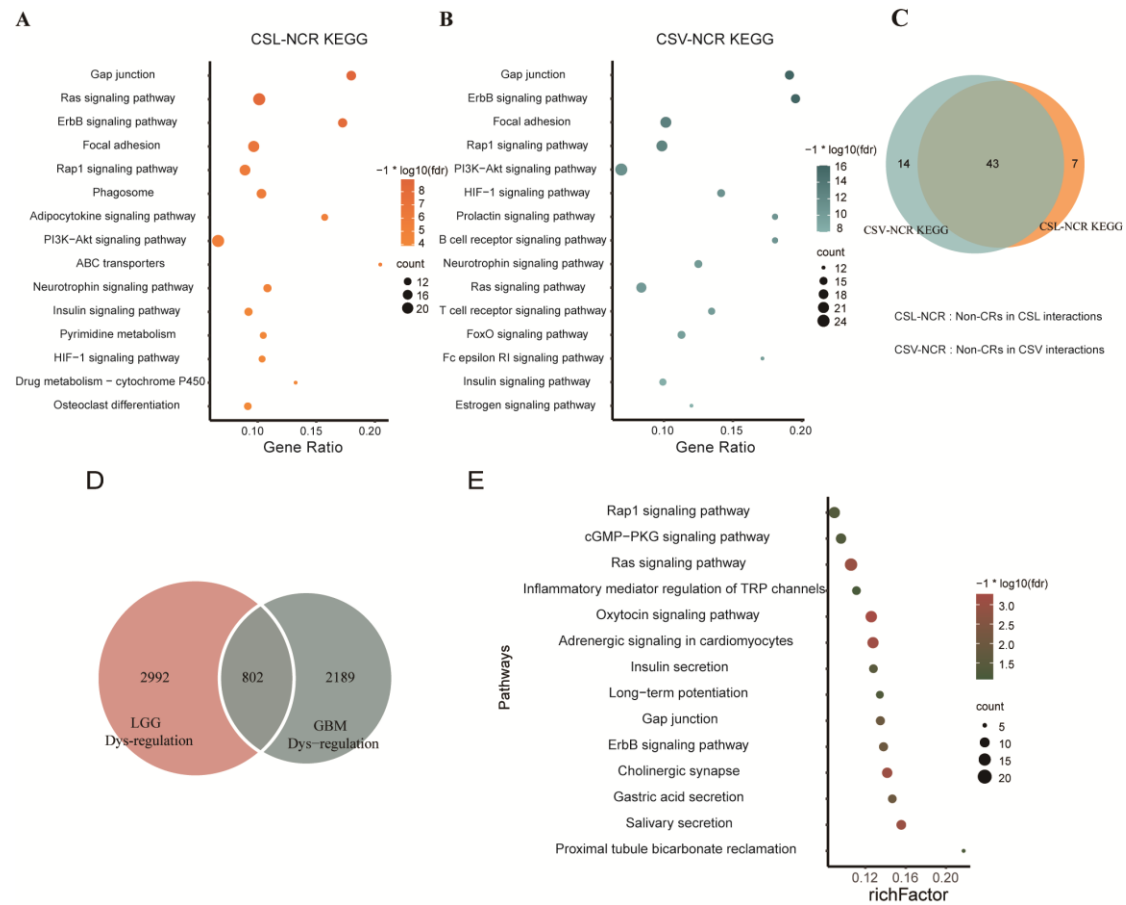

**Fig. S4. Functional analysis of the CRs genetic interaction**

Genes interacted with CRs in CSL (A) and CSV (B) genetic interactions were enriched with KEGG pathways. Only top 15 significantly enriched pathways were showed. (C) Overlapping of pathways enriched in CSL and CSV. (D) The overlapping of differential expression genes between GBM and LGG patients with *TP53* mutations, according to the median expression value of *KIT*. (E) The overlapping genes in (C) enriched in KEGG pathways.

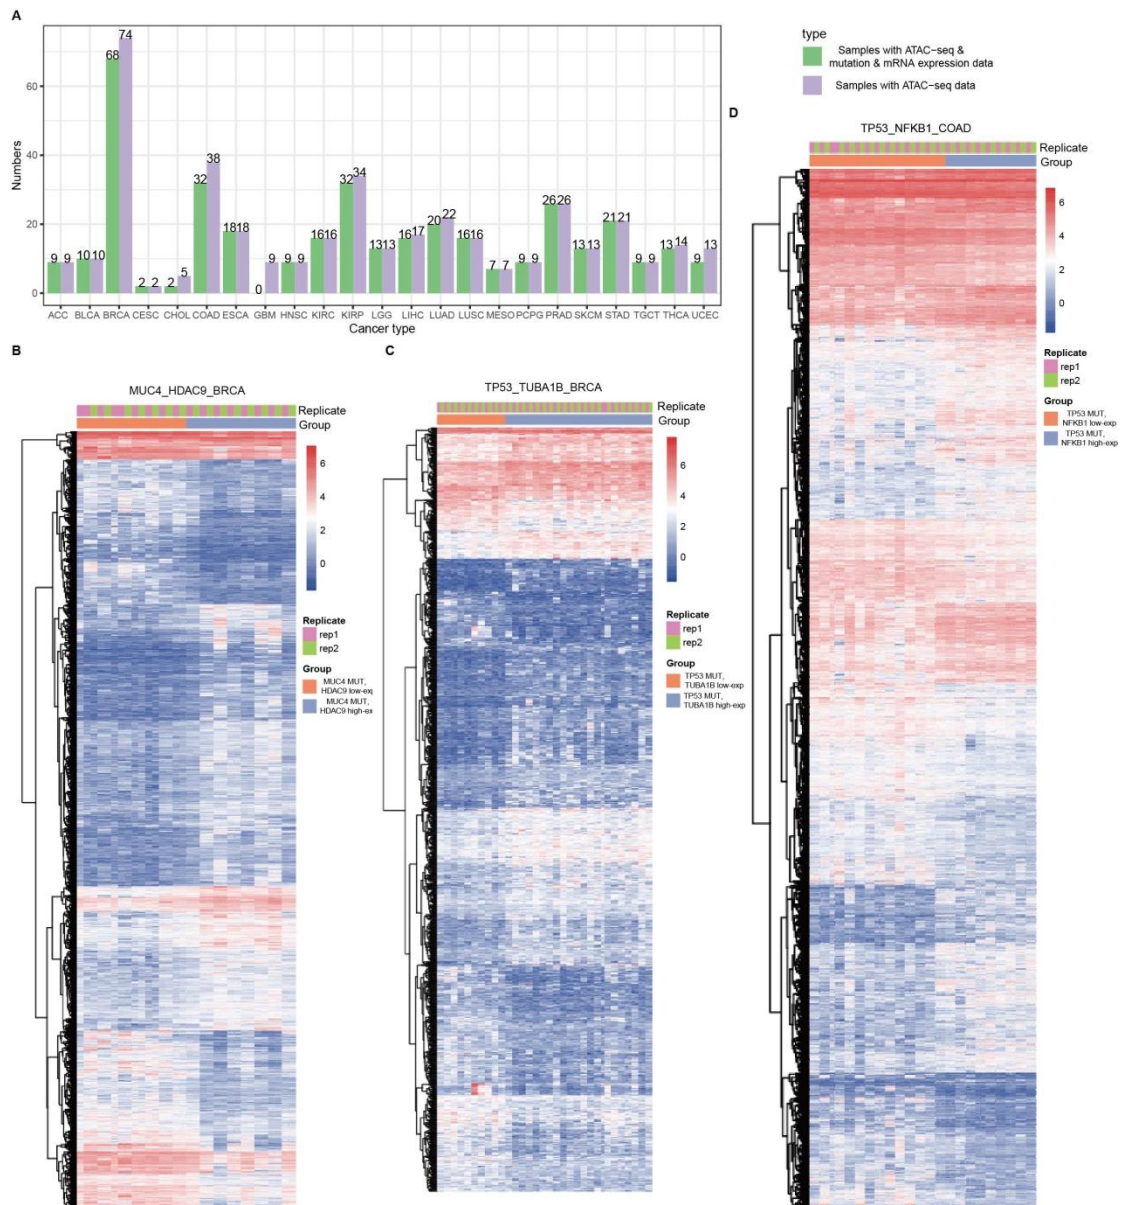

**Fig. S5. Differential chromatin accessibility for CSL interactions.** (A) The sample size of patients with multiple omics datasets in TCGA. Hierarchical clustering of the differentially accessible peaks between patients with and without *MUC4-HDAC9* interaction (B), *TP53-TUBA1B* interaction (C) in breast cancer and *TP53-NFKB1* interaction (D) in colon cancer, respectively. Colors represent peak count data.

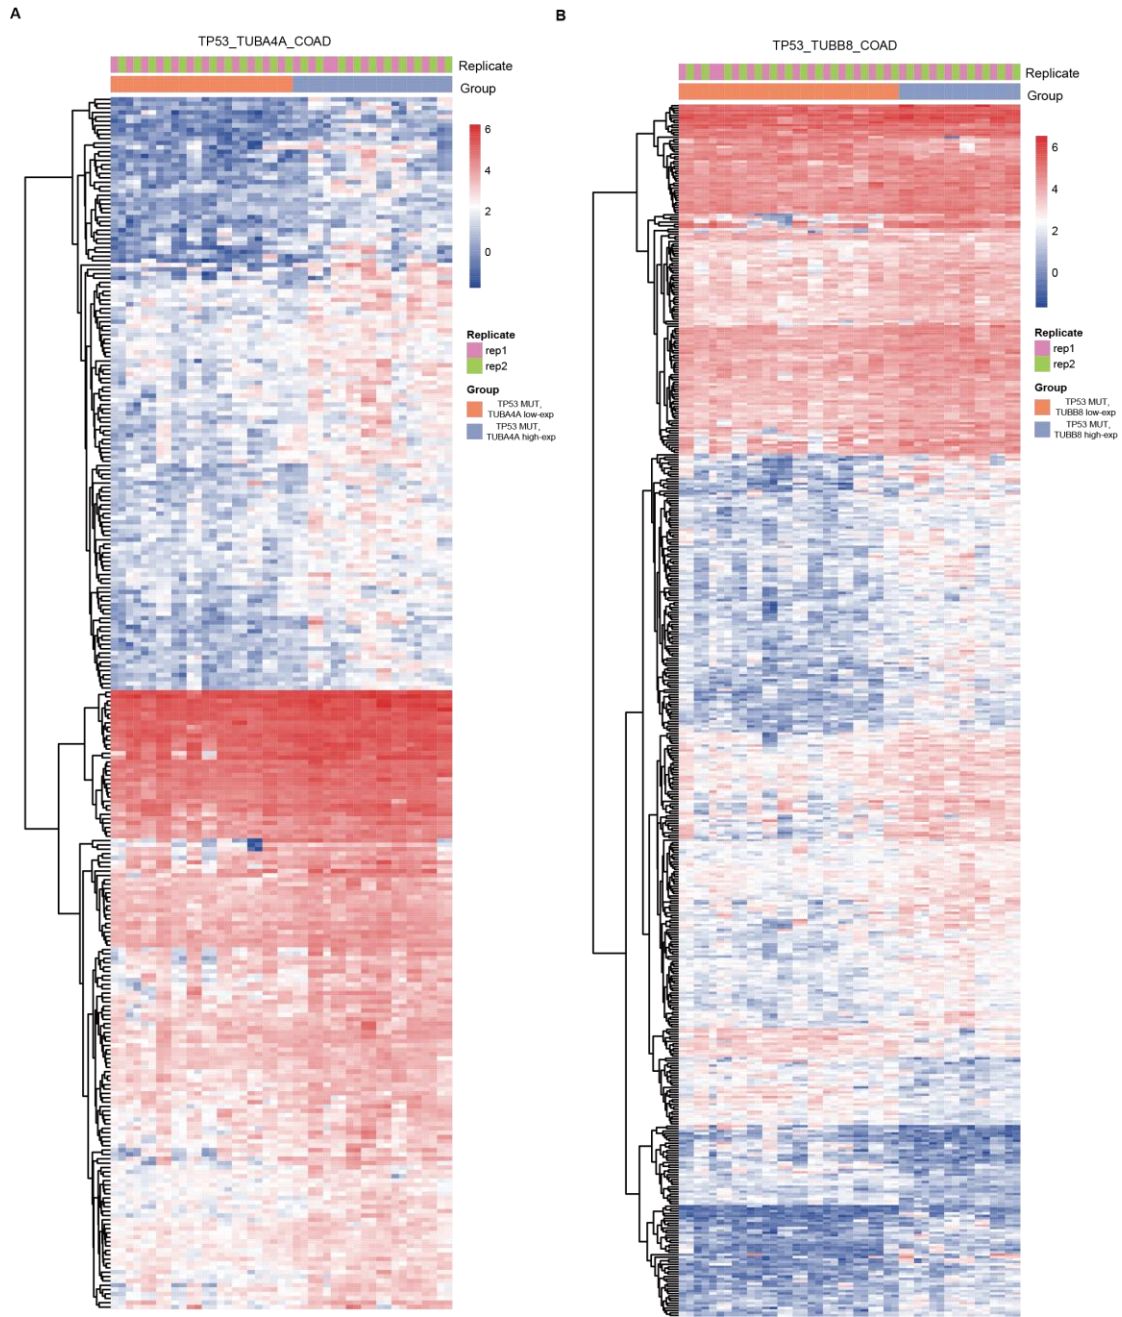

**Fig. S6. Differential chromatin accessibility for CSV interactions.** Hierarchical clustering of the differentially accessible peaks between colon cancer patients with and without *TP53-TUBA4A* interaction (A) and *TP53-TUBB8* interaction (B). Colors represent peak count data.

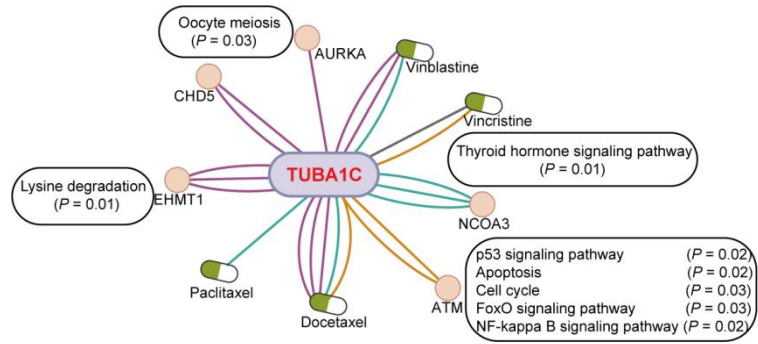

**Fig. S7. *TUBA1C* subnetwork in drug related CSL network**

*TUBA1C* subnetwork and functional analysis of the genes interacted with *TUBA1C* in drug related CSL network.



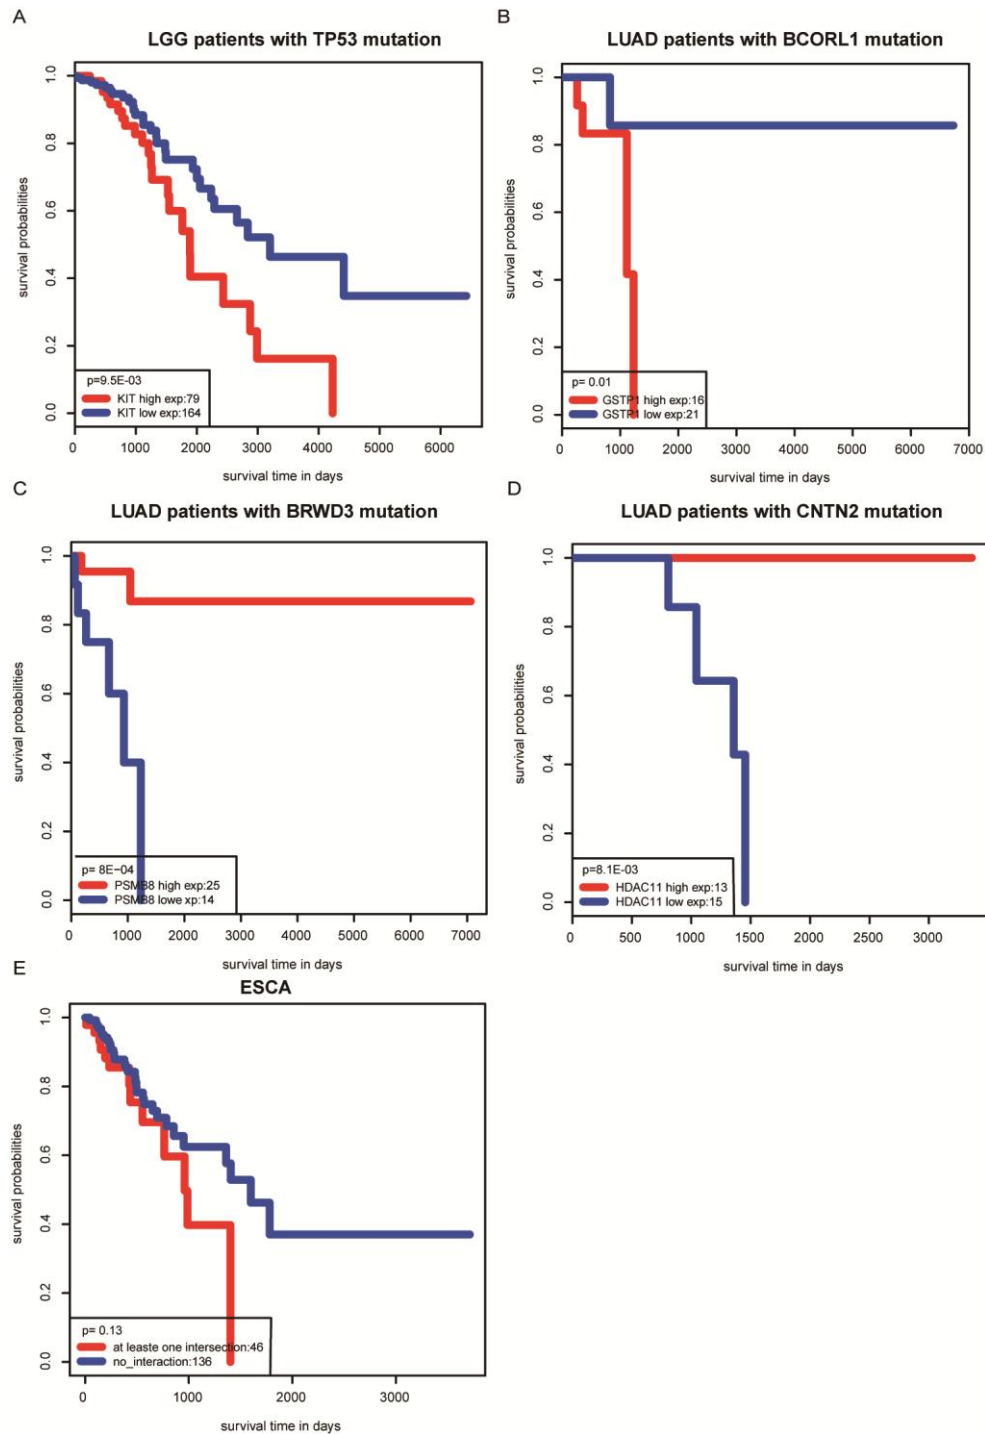

**Fig. S8. CRs genetic interactions were related to the prognosis of patients.**

(A) The Kaplan-Meier overall survival of *TP53* mutation carriers in LGG patients in two groups as follows: *KIT* low-expression and *KIT* high-expression. (B) The Kaplan-Meier overall survival of *BCORL1* mutation carriers in LUAD patients in two groups as follows: *GSTP1* low-expression and *GSTP1* high-expression. (C) The Kaplan-Meier overall survival of *BRWD3* mutation carriers

in LUAD patients in two groups as follows: *PSMB8* low-expression and *PSMB8* high-expression.

(D) The Kaplan-Meier overall survival of *CNTN2* mutation carriers in LUAD patients in two groups as follows: *HDAC11* low-expression and *HDAC11* high-expression. (E) The Kaplan-Meier overall survival of ESCA patients in two groups as follows: at least one CSV interaction and without CSV interactions.

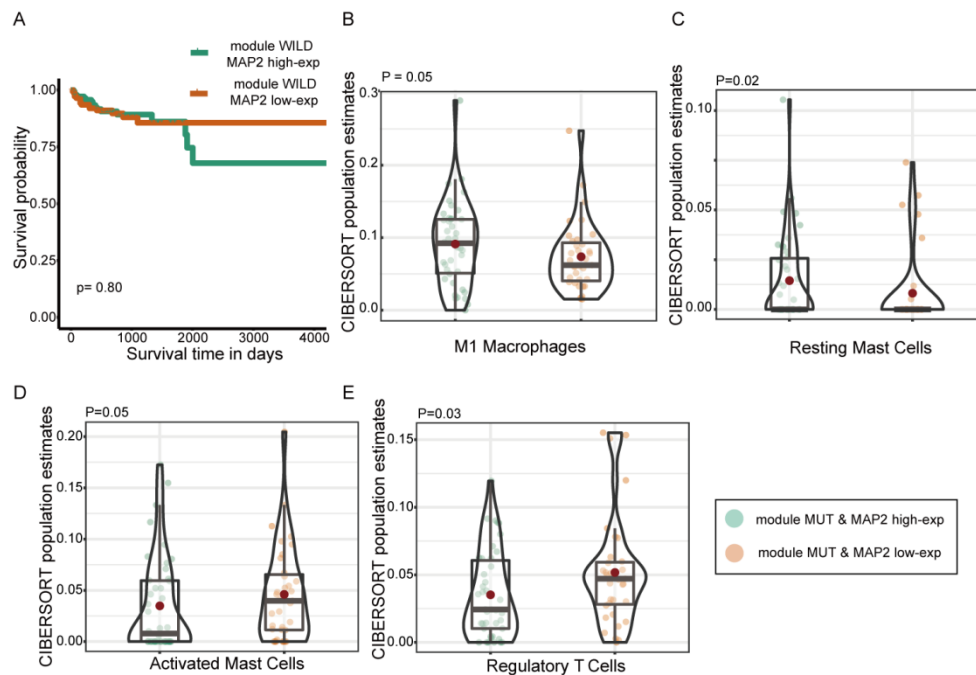

**Fig.S9. *MAP2* CSL module mediate poor prognosis in COAD**

(A) The Kaplan-Meier survival analysis of classifications generated by *MAP2* expression in the patients without module partner genes mutation. The distribution of M1 macrophages (B), Resting Mast cells (C), Activated Mast cells (D) and Tregs (E) infiltration for 2 subtypes with *MAP2* high or low expression in COAD patients carrying mutations of *MAP2* CSL module. *P* values were calculated by one-sided Wilcoxon rank-sum test.

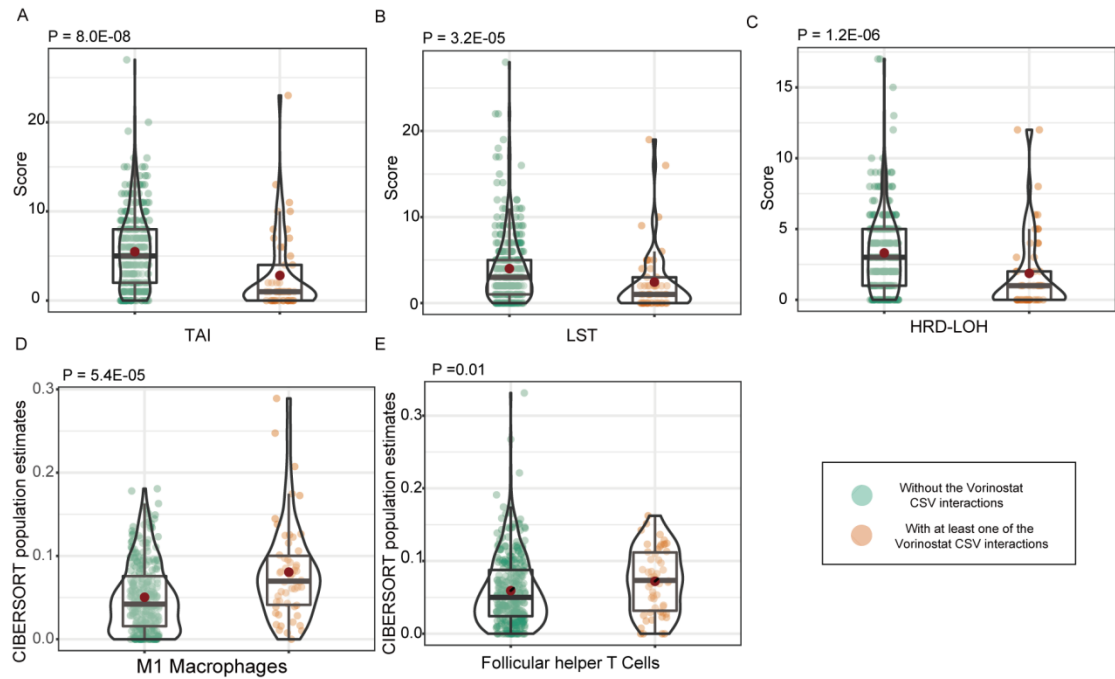

**Fig.S10. Vorinostat CSV module induces multiple omics deregulation in COAD**

The comparison of HRD-telomeric allelic imbalance score (A), HRD-large-scale state transition score (B), HRD-loss of heterozygosity score (C), M1 macrophages (D) and follicular helper T cells (E) infiltration for 2 subtypes. *P* values were calculated by one-sided Wilcoxon rank-sum test.

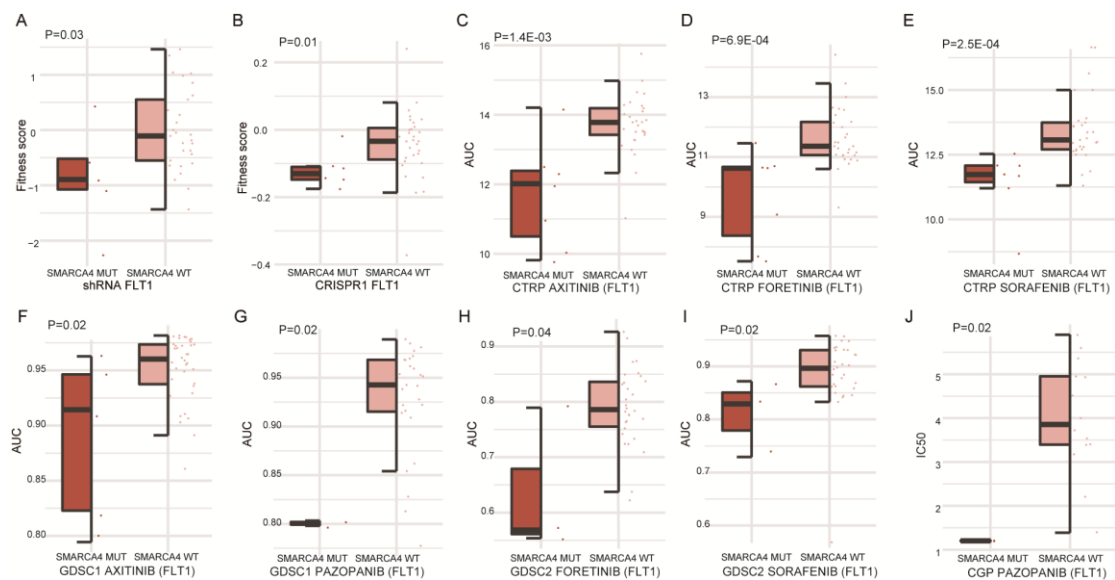

**Fig. S11. SMARCA4 mutation was sensitive to *FLT1* inhibitor in ovarian cancer cell lines.**

Ovarian cancer cell lines with *SMARCA4* mutation had worse viability when *FLT1* were knocked down in shRNA (A) and CRISPR1 (B). (C)-(J). Ovarian cancer cell lines with *SMARCA4* mutation were sensitive to inhibitor of *FLT1* in CTRP, GDSC1, GDSC2.

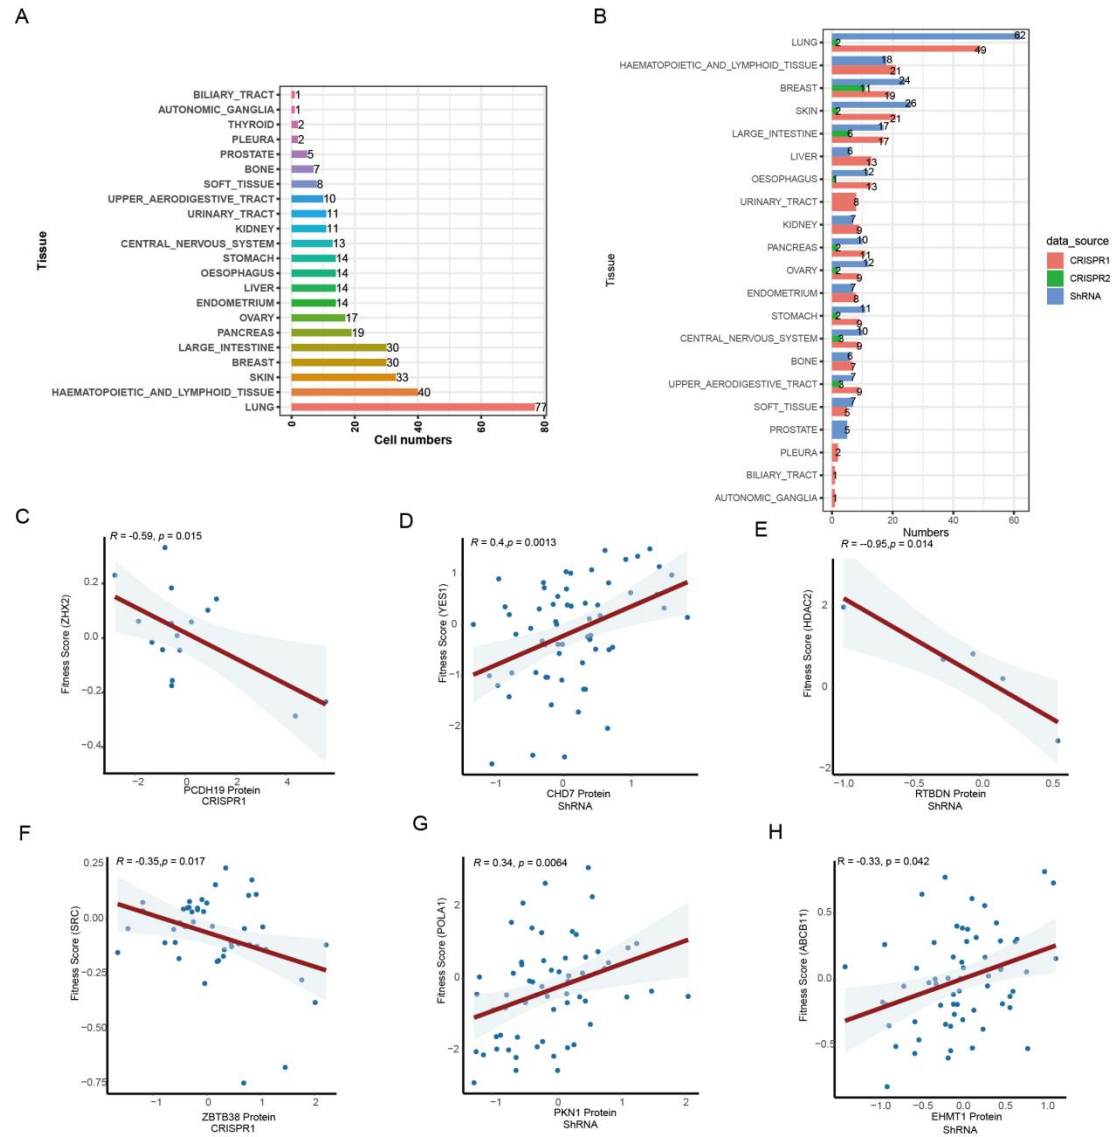

**Fig. S12. The correlation between protein expression of mutated genes and the target genes dependency in lung cancer cell lines.** (A). Overview of the cell line numbers detected by mass spectrometry. (B). Overview of the intersection cell line numbers detected by mass spectrometry and CRISPR/shRNA screens. Examples of CSL *PCDH19-ZHX2*(C), *CHD7-YES1*(D), *RTBDN-HDAC2* (E) and CSV *ZBTB38-SRC*(F), *PKNI-POLA1*(G), *EHMT1-ABCB11*(H)

interactions showed correlations between corresponding protein expression of mutated genes and the target genes dependency score in lung cancer cell lines.

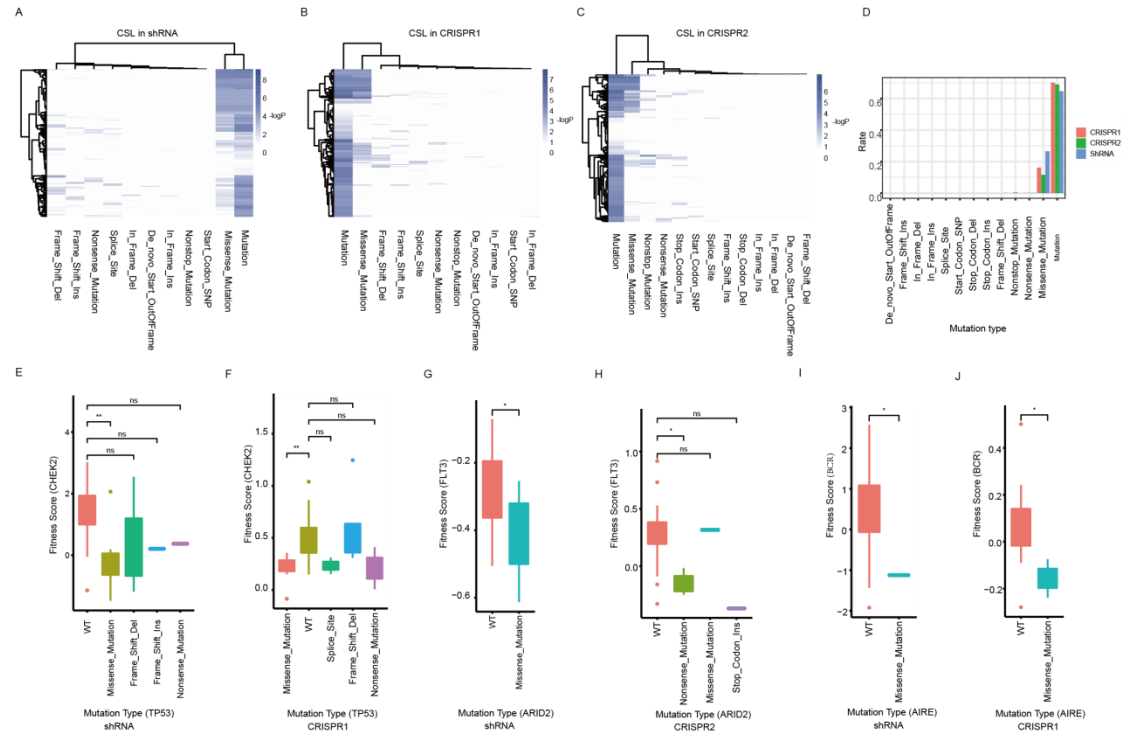

**Fig. S13. Comparison of the multi-mutation types conferred to CSL in the functional screen datasets.** Cell lines with different partner gene mutation types result in CSL effect in shRNA (A), CRISPR1 (B), and CRISPR1 (C). Heatmap of different mutation types show the  $-\log P$ .  $P$  values were calculated by one-sided Wilcoxon rank-sum test when comparison the target gene fitness score of cell lines with partner gene wild-type and specific type mutation. (D).The ratio of specific mutation type conferred to synthetic lethality effect in the functional screen datasets. (E-J).The comparison of target gene fitness scores with distinct mutation types. \* indicates  $P < 0.05$ , \*\* indicates  $P < 0.005$ .

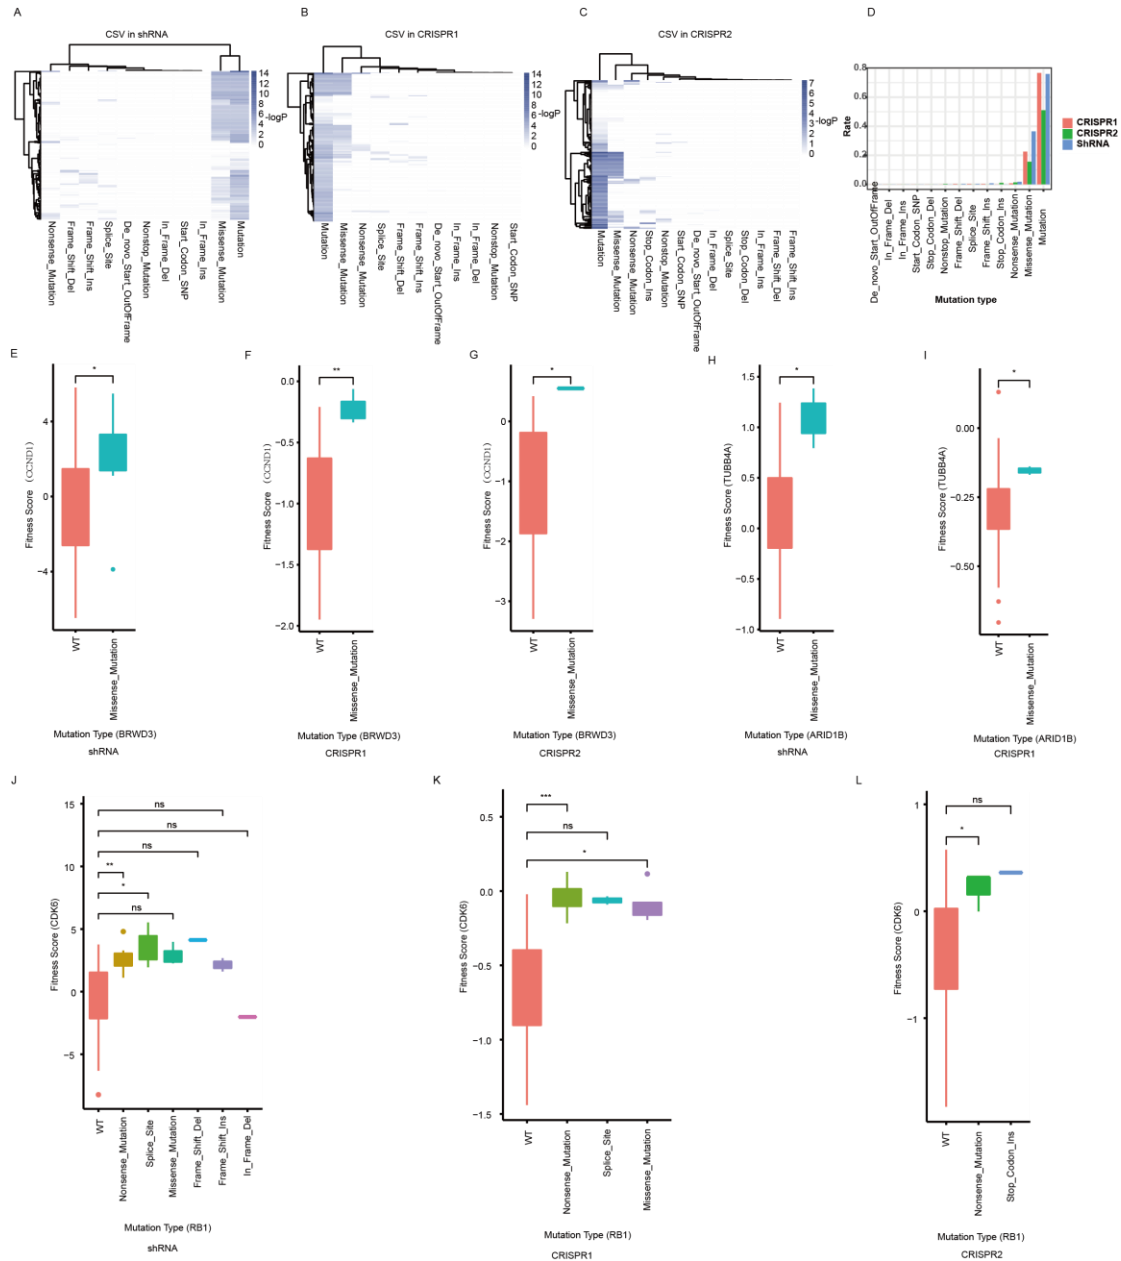

**Fig. S14. Comparison of the multi-mutation types conferred to CSV in the functional screens datasets.** Cell lines with different partner gene mutation types result in CSV effect in shRNA (A), CRISPR1 (B) and CRISPR1 (C). Heatmap of the different mutation types shows the  $-\log P$ .  $P$  values were calculated by one-sided Wilcoxon rank-sum test when comparison the target gene fitness score of cell lines with partner gene wild-type and specific type mutation. (D). The ratio of specific mutation type conferred to synthetic viability effect in the functional screen datasets. (E-L). The comparison of target gene fitness scores with distinct mutation types. \* indicates  $P <$

0.05, \*\* indicates  $P < 0.005$ , \*\*\* indicates  $P < 0.0005$ .

### Additional file 1: Supplementary Tables

Table S1. Functional screen datasets

| Datasets | Cell lines size | Cell line sources | Data Sources                                                                        |
|----------|-----------------|-------------------|-------------------------------------------------------------------------------------|
| CRISPR1  | 625             | CCLC              | <a href="https://depmap.org/portal/">https://depmap.org/portal/</a>                 |
| CRISPR2  | 325             | COSMIC            | <a href="https://score.depmap.sanger.ac.uk/">https://score.depmap.sanger.ac.uk/</a> |
| shRNA    | 501             | CCLC              | <a href="https://depmap.org/portal/">https://depmap.org/portal/</a>                 |

Table S2. Pharmacogenomics datasets

| Datasets | Cell line sources | Sensitivity measure | Cell lines size | Drug size | Data Sources                                                                                  |
|----------|-------------------|---------------------|-----------------|-----------|-----------------------------------------------------------------------------------------------|
| CCLC     | CCLC              | IC50                | 504             | 24        | <a href="https://portals.broadinstitute.org/ccle">https://portals.broadinstitute.org/ccle</a> |
| CGP      | COSMIC            | IC50                | 639             | 130       | <a href="http://cancer.sanger.ac.uk/cosmic">http://cancer.sanger.ac.uk/cosmic</a>             |
| CTRP     | CCLC              | AUC                 | 835             | 481       | <a href="https://www.broadinstitute.org/ctrp/">https://www.broadinstitute.org/ctrp/</a>       |
| GDSC1    | COSMIC            | AUC                 | 988             | 304       | <a href="https://www.cancerrxgene.org/">https://www.cancerrxgene.org/</a>                     |
| GDSC2    | COSMIC            | AUC                 | 811             | 169       | <a href="https://www.cancerrxgene.org/">https://www.cancerrxgene.org/</a>                     |
